# Supplementary material for: How Does a Community Respond to Changes in Aircraft Noise? A Comparison of Two Surveys Conducted 11 Years Apart in Ho Chi Minh City
Source: MDPI journal article supplement (doi:10.3390/ijerph18084307), 2021-04-19
Supplement: s1 [file s1]

# How Does a Community Respond to Changes in Aircraft Noise? A Comparison of Two Surveys Conducted 11 Years apart in Ho Chi Minh City

**Table S1.** Similarities and differences in the methods of the two surveys.

| Item                                   | 2008 Survey                                                                                                                                   | 2019 Survey                                                                                                                                                             |
|----------------------------------------|-----------------------------------------------------------------------------------------------------------------------------------------------|-------------------------------------------------------------------------------------------------------------------------------------------------------------------------|
| Noise source type                      | military and civil aircraft                                                                                                                   | civil aircraft                                                                                                                                                          |
| Exposure assessment methods            | field measurements                                                                                                                            | estimated using noise map                                                                                                                                               |
| Noise level at participants' residence | one exposure value per survey site                                                                                                            | exact values at the residents' addresses                                                                                                                                |
| Choice of survey areas                 | selected to reflect exposure situation from minimum to loudest aircraft noise level                                                           | same as 2008 survey                                                                                                                                                     |
| Noise annoyance question and scale     | ICBEN7's standardized question and scale                                                                                                      | same as 2008 survey                                                                                                                                                     |
| Sleep quality question and scale       | <p>"What is the status of your daily sleep?"</p> <p>a five-point scale (1. Extremely good; 2. Good; 3. Neutral; 4. Bad; 5. Extremely bad)</p> | <p>"During the past four weeks, how would you rate the quality of your sleep?"</p> <p>a five-point scale (1. Very good; 2. Fairly good; 3. Fairly bad; 4. Very bad)</p> |

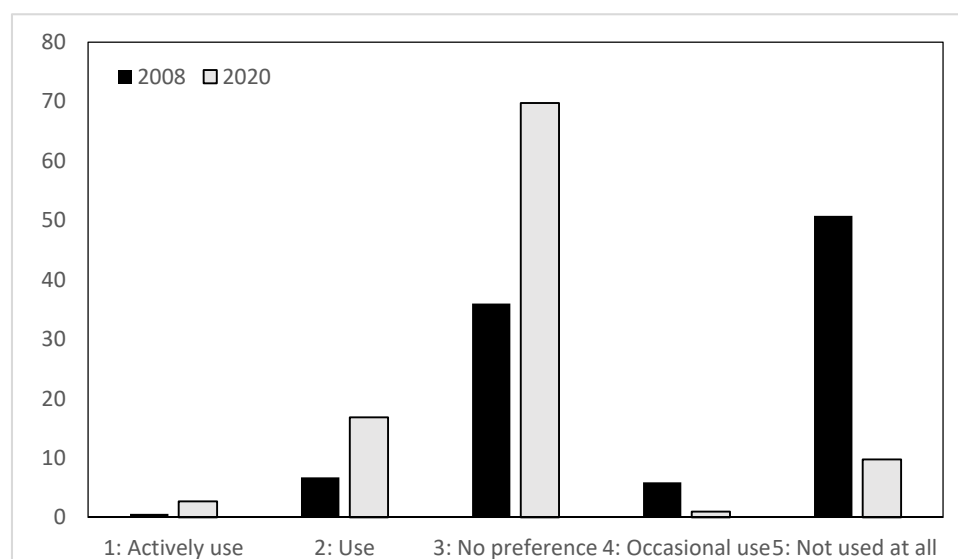

(a) Frequency of air-transport use

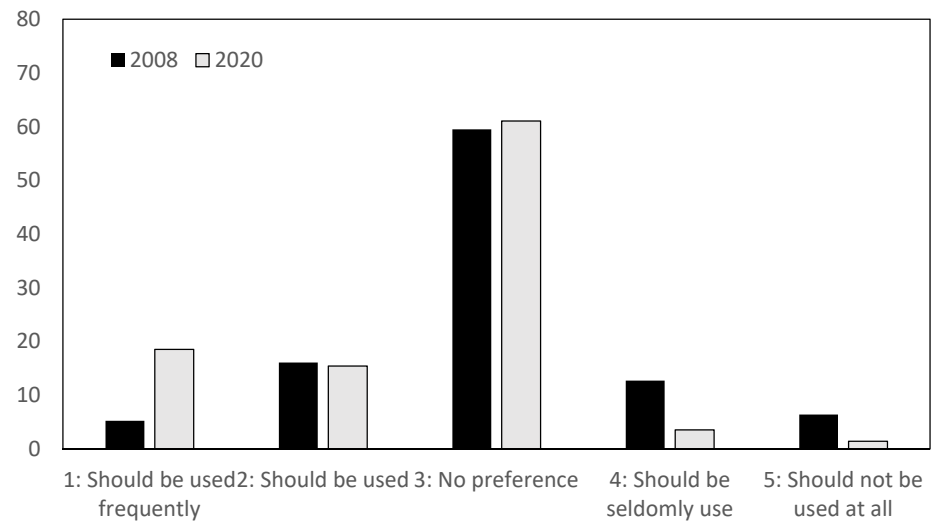

(b) Benefits to the society of air transport

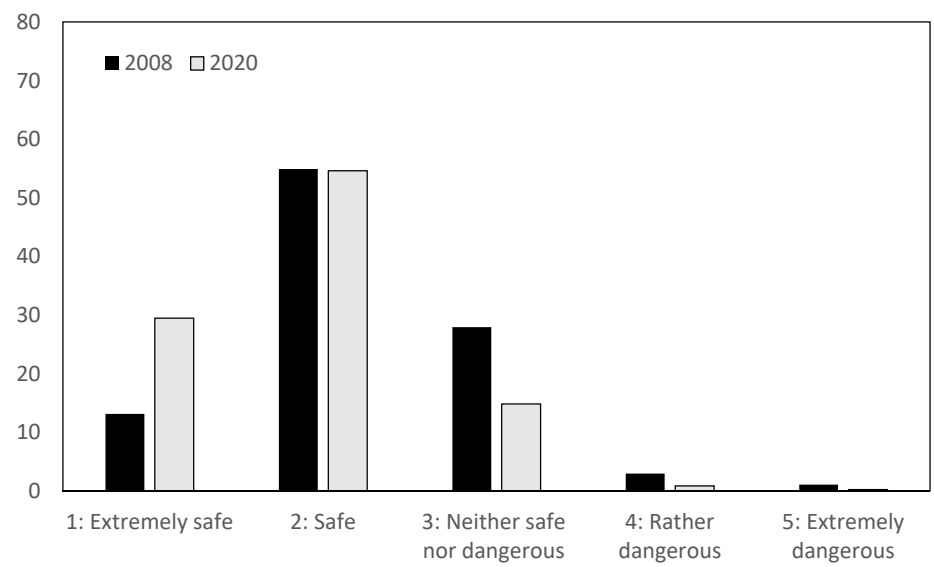

(c) Safety of air transport.

**Figure S1.** Comparison of the attitude to air transport as per the 2008 and 2020 surveys.
